# Supplementary material
Source: MDPI journal article supplement (https://www.mdpi.com/1996-1073/14/9/2633)
Supplement: s1 [file s1]

Supplemental material

# An Environmental and Societal Analysis of the US Electrical Energy Industry Based on the Water-Energy Nexus

Gabriela Shirkey<sup>1,2</sup>, Megan Belongueay<sup>3</sup>, Susie Wu<sup>4</sup>, Xiaoguang Ma<sup>5</sup>, Hassan Tavakol-Davani<sup>6</sup>, Annick Anctil<sup>7</sup>, Sandra Marquart-Pyatt<sup>8</sup>, Rodney A. Stewart<sup>9</sup>, Parikhith Sinha<sup>10</sup>, Richard Corkish<sup>11</sup>, Jiquan Chen<sup>1,2</sup> and Ilke Celik<sup>\* 12</sup>

- <sup>1</sup> Department of Geography, Environment and Spatial Sciences, Michigan State University, 673 Auditorium Rd, East Lansing, MI 48824, USA; shirkeyg@msu.edu (G.S.); jqchen@msu.edu (J.C.)
- <sup>2</sup> Center for Global Change and Earth Observations, Michigan State University, 1405 S Harrison Rd, East Lansing, MI 48823, USA
- <sup>3</sup> Department of Engineering Physics, University of Wisconsin–Platteville 1 University Plaza, Platteville, WI 53818, USA; perryyme@uwplatt.edu
- <sup>4</sup> Institute of Agricultural Resources and Regional Planning, Chinese Academy of Agricultural Sciences, No.12 Zhongguancun South St., Beijing 100081, China; ruqunvi@hotmail.com
- <sup>5</sup> Shenzhen Key Laboratory of Urban Planning and Decision Making, Harbin Institute of Technology, Shenzhen 518055, China; max@uwplatt.edu
- <sup>6</sup> Department of Civil, Construction & Environmental Engineering, San Diego State University, 5500 Campanile Dr., San Diego, CA 92182, USA; htavakol@sdsu.edu
- <sup>7</sup> Department of Civil & Environmental Engineering, Michigan State University, 673 Auditorium Rd, East Lansing, MI 48824, USA; anctilan@egr.msu.edu
- <sup>8</sup> Department of Sociology, Michigan State University, 673 Auditorium Rd, East Lansing, MI 48824, USA; marqua41@msu.edu
- <sup>9</sup> School of Engineering and Built Environment, Griffith University, Brisbane, QLD 4222, Australia; r.stewart@griffith.edu.au
- <sup>10</sup> First Solar, Tempe, AZ 85281, USA; parikhith.sinha@firstsolar.com
- <sup>11</sup> School of Photovoltaic and Renewable Energy Engineering, University of New South Wales, Sydney, NSW 2052, Australia; r.corkish@unsw.edu.au
- <sup>12</sup> Department of Civil and Environmental Engineering, South Dakota School of Mines and Technology, 501 E. St Joseph St, Rapid City, SD 57701, USA
- \* Correspondence: Ilke.Celik@sdsmt.edu; Tel.: +1-(605)-394-2439

**Citation:** Shirkey, G.; Belongueay, M.; Wu, S. An Environmental and Societal Analysis of the US Electric Energy Industry based on the Water-Energy Nexus. *Energies* **2021**, *14*, 2633.  
<https://doi.org/10.3390/en14092633>

Received: date

Accepted: date

Published: 12 May 2021

**Publisher's Note:** MDPI stays neutral with regard to jurisdictional claims in published maps and institutional affiliations.

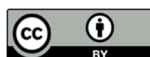

**Copyright:** © 2021 by the authors.  
Licensee MDPI, Basel, Switzerland.  
This article is an open access article distributed under the terms and conditions of the Creative Commons Attribution (CC BY) license (<http://creativecommons.org/licenses/by/4.0/>).

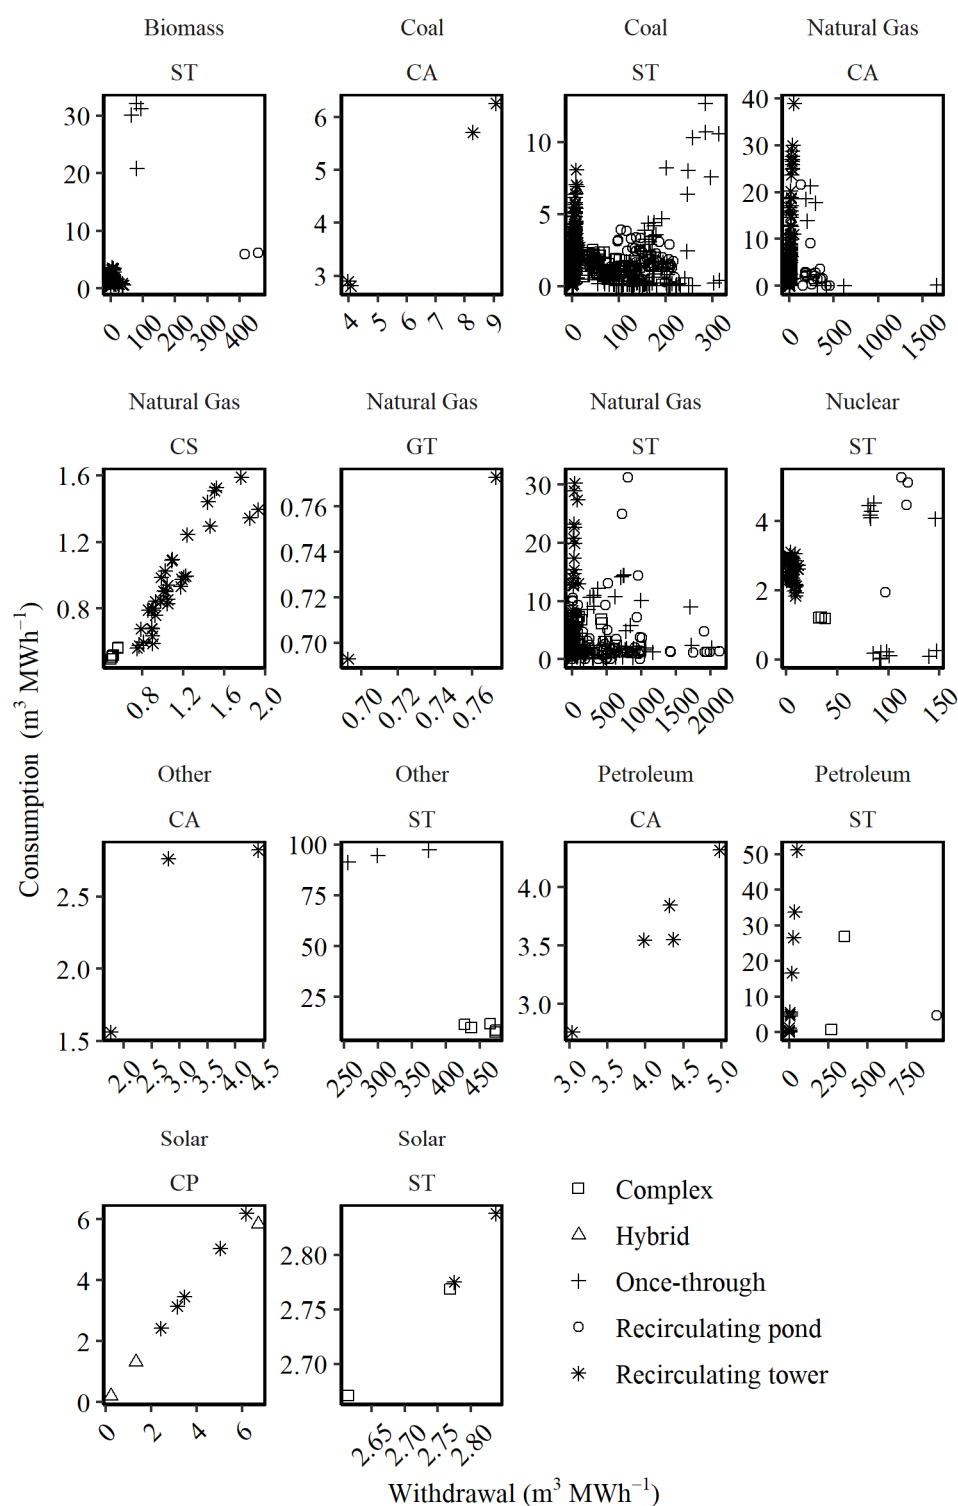

**Figure S1.** Power plant (>100MW) rates of water use by energy source and composition of prime mover and cooling system type observed and applied for mean estimates by energy source. Hybrid cooling is recirculating with induced draft cooling tower(s) with dry cooling. Complex indicates there is more than one cooling system. Prime movers include steam (ST), combined-cycle – steam part (CA), combined-cycle single-shaft combustion turbine and steam turbine share of single generator (CS), combustion gas turbine (GT), and energy storage concentrated solar power (CP).

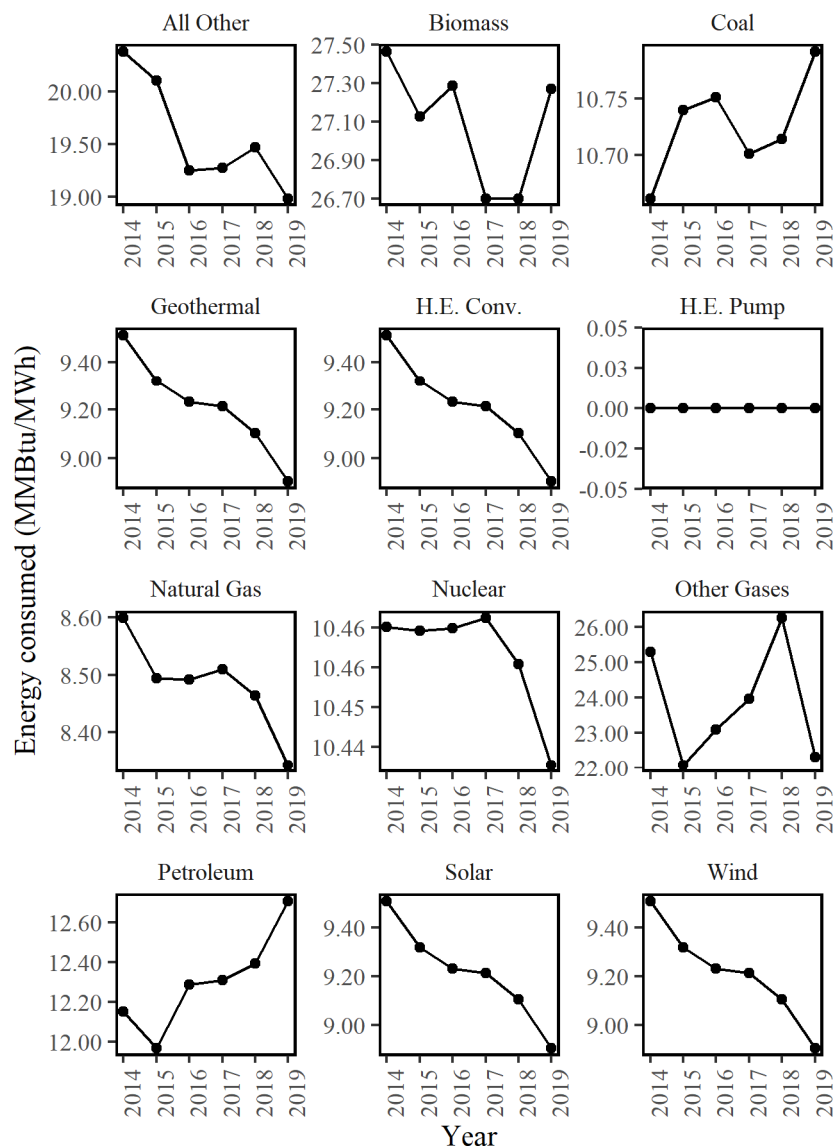

**Figure S2.** Rate of primary energy consumption (MMBtu/MWh) by energy source 2014-2019, where H.E. Pump represents hydro-electric pump storage, which reported zero primary energy consumption, and H.E. Conv. Represents hydro-electric conventional. Other gases include blast furnace gas; and all other includes batteries, hydrogen, purchased steam sulfur, tire-derived fuels and other miscellaneous energy sources.

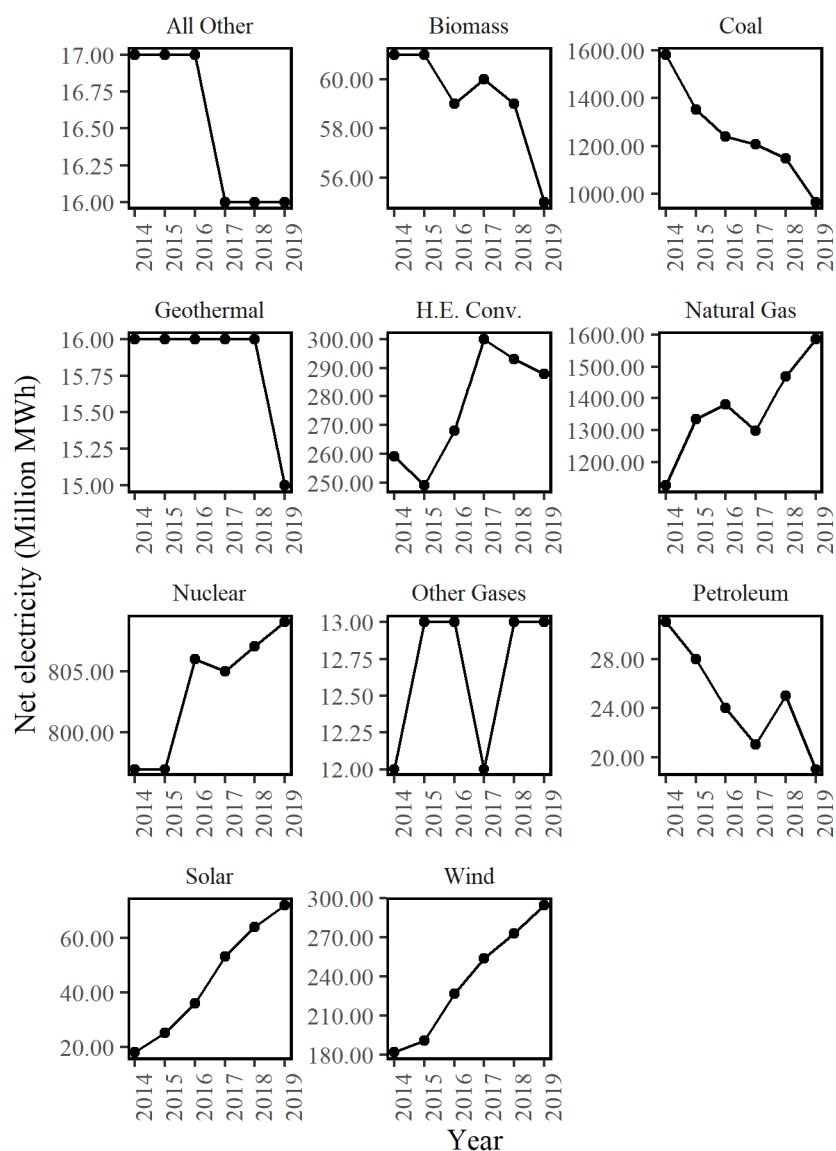

**Figure S3.** Net electricity produced by energy source 2014-2019, where H.E. Conv. represents hydro-electric conventional. Other gases include blast furnace gas; and all other includes batteries, hydrogen, purchased steam sulfur, tire-derived fuels and other miscellaneous energy sources. H.E. pump is not shown due to negative net generation caused by the nature of its infrastructure.

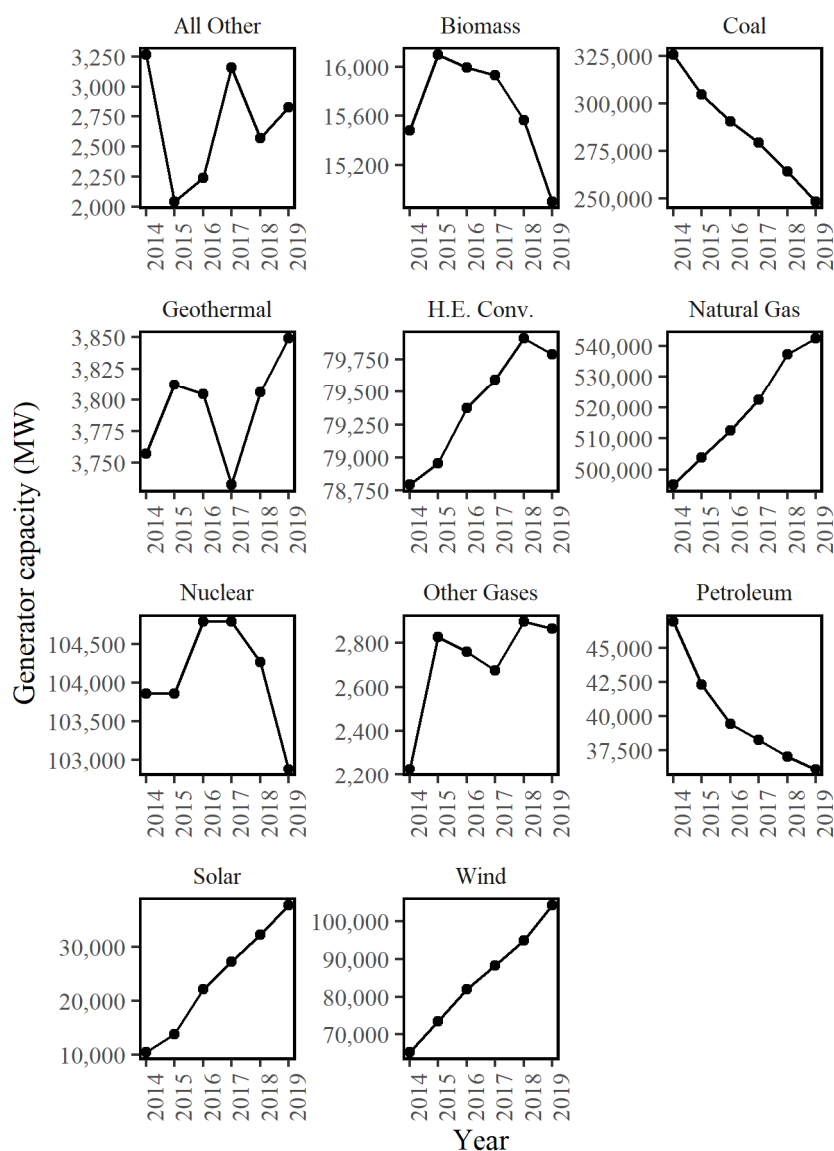

**Figure S4.** Temporal changes in generator nameplate capacity 2016-2019 by energy source, where H.E. Conv. represents hydro-electric conventional. Other gases includes blast furnace gas; and all other includes batteries, hydrogen, purchased steam sulfur, tire-derived fuels and other miscellaneous energy sources.

Table S1. The average emissions (kg) of CO<sub>2</sub>, SO<sub>2</sub> and NO<sub>x</sub> per MWh by energy source 2014-2019. AVG is average of 2014-2019.

| Energy Source | CO <sub>2</sub> | SO <sub>2</sub> | NO <sub>x</sub> |
|---------------|-----------------|-----------------|-----------------|
|               | (kg/MWh)        | (kg/MWh)        | (kg/MWh)        |
| Petroleum     | 1,081.92        | 3.35            | 1.75            |
| Natural Gas   | 449.18          | s*              | 0.28            |
| Coal          | 1,019.79        | 1.37            | 0.77            |
| AVG           | 850.30          | 1.57            | 0.93            |

\* Denotes value < 0.01.
